# Supplementary material
Source: Elsevier journal article supplement (https://www.sciencedirect.com/science/article/pii/S2529993X19301285)

SUPPLEMENTARY MATERIAL

Figure 1s. Prevalence of risk factors according to age.

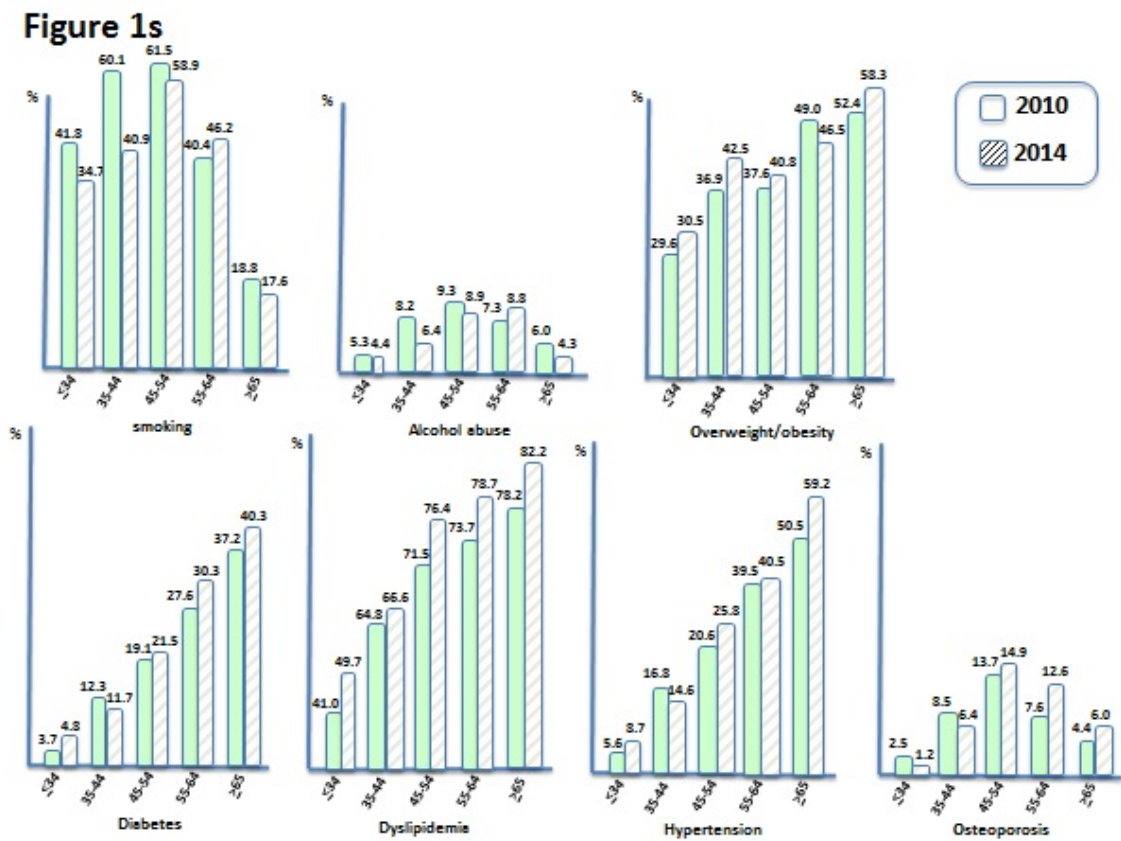

Figure 2s. Framingham coronary heart risk score according to age.

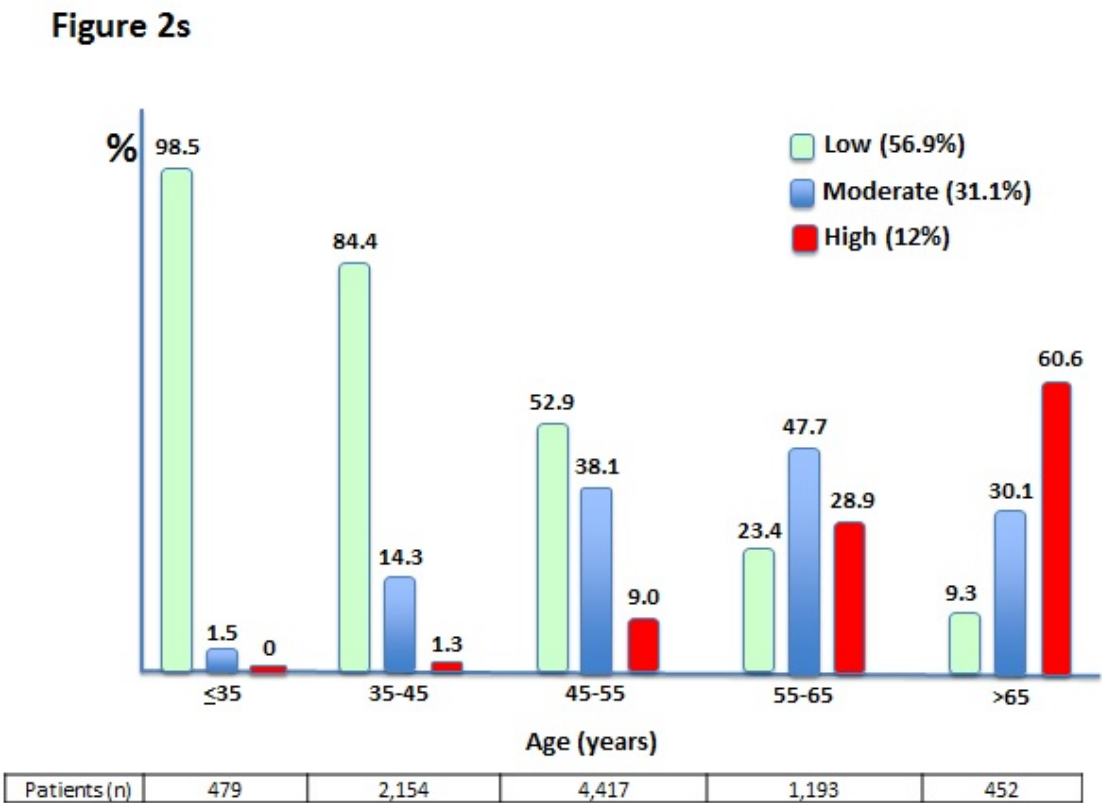

Figure 3s. D:A:D renal risk score according to age.

Figure 3s

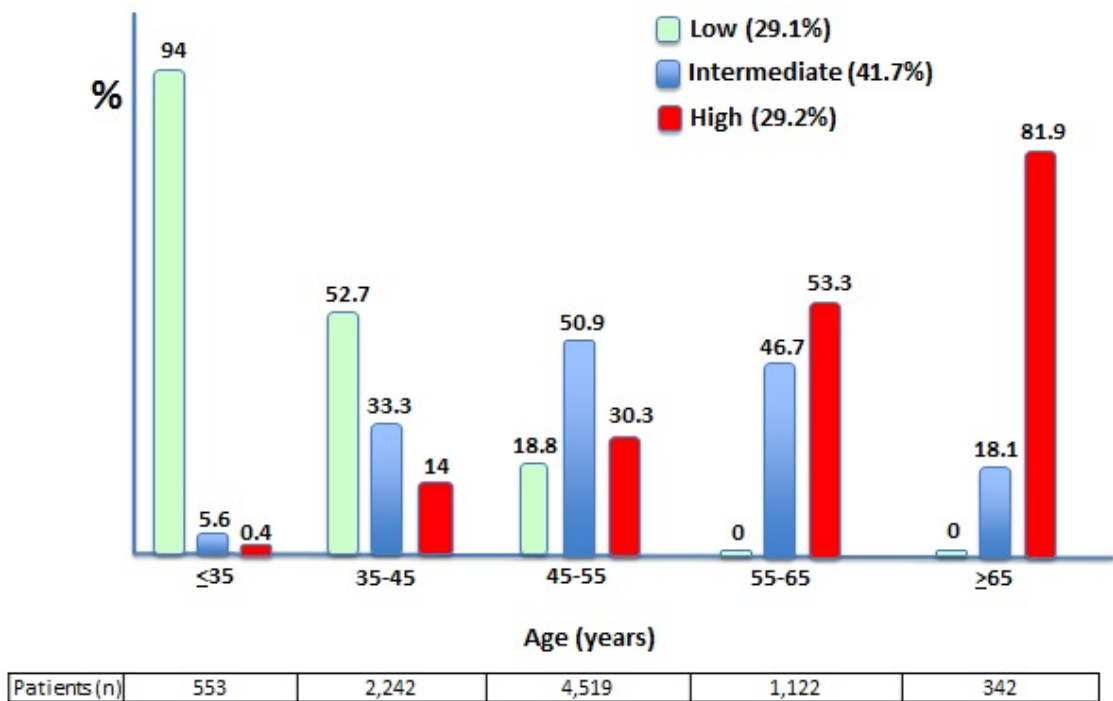

Supplement: mmc1 [file S2529993X19301285:mmc1.pdf]
